# Supplementary material
Source: HighWire-hosted journal article supplement (https://ijgc.bmj.com/highwire/filestream/22919/field_highwire_adjunct_files/0/ijgc-2021-003096supp001_data_supplement.pdf)

**Supplementary Figure S1. Forest plot of multivariate analysis of survival.** Forest plot demonstrating survival outcome of significant variables determined by the multivariate analysis. Squares represent the HR and the lines their 95% CI. Urban and rural site of residence had worse survival for ovarian cancer patients.

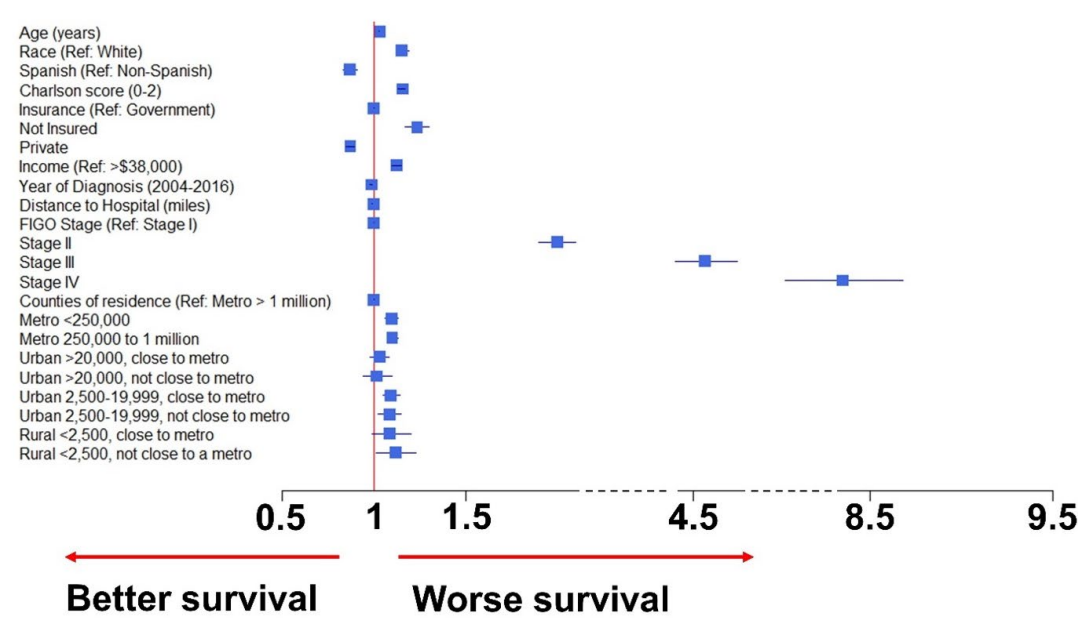

Supplement: ijgc-2021-003096supp001_data_supplement.pdf [file ijgc-2021-003096supp001_data_supplement.pdf]
